# Supplementary material
Source: Elsevier journal article supplement (https://www.sciencedirect.com/science/article/pii/S1885585725003500)
Supplement: mmc1 [file mmc1.pdf]

## SUPPLEMENTARY DATA

### Statistical analysis

The effect size, calculated as the standardized mean difference (Cohen's  $d$ ),<sup>1</sup> served as the basis for estimating the sample size using a 2-sample  $t$ -test comparing mean NT-proBNP levels at 6 months between the ARNI maintenance and de-escalation groups. Although the effect size of 0.4 was derived from the NT-proBNP level at 6 months in the continuation and withdrawal groups of the TRED-HF study,<sup>2,3</sup> we expected an effect size of 0.6 based on investigator judgment and clinical expectations in our study. Assuming an effect size of 0.6, a significance level of 0.05 and statistical power of 80%, the required sample size was calculated to be 45 participants per group. Considering a dropout rate of 10%, this study planned to recruit a total of 100 participants (50 participants per group). The block randomization table was made using the SAS program (version 9.4).

Data for continuous variables are presented as the mean  $\pm$  standard deviation or median [interquartile range], as appropriate based on the normality of their distribution. Categorical variables are described as numbers and relative frequencies (%). Group comparisons were performed using the Student  $t$ -test or the Mann-Whitney U test for continuous variables, and the chi-square test or Fisher exact test for categorical variables. To evaluate within-group changes from baseline to follow-up, paired  $t$ -tests or Wilcoxon signed-rank tests were used for continuous and ordinal variables, and the McNemar test was applied for paired binary categorical variables. The Shapiro-Wilk test was used to test the normality assumption for continuous variables.

For the analysis of longitudinal primary outcomes measured at 6 and 12 months, a linear mixed-effects model was used to evaluate the interaction between treatment allocation and timepoint on log-transformed NT-proBNP levels, adjusting for age, sex, ischemic etiology, atrial fibrillation, and chronic kidney disease, with a random intercept specified for each participant. The significance of fixed effects was assessed using the Wald test. Furthermore, given the nonnormal distribution of the 12-month-to-baseline NT-proBNP ratio, a Box-Cox transformation ( $\lambda = 0.356$ ) was performed, and linear regression models were subsequently used to assess interactions between treatment allocation and

baseline characteristics.

To assess group-by-timepoint interaction effects for other clinical endpoints, including New York Heart Association class, medication use, and echocardiographic parameters, generalized linear mixed-effects models and linear mixed-effects models were applied to binary and continuous outcomes, respectively.

Statistical analyses were performed using R statistical software (version 4.1.0; R Foundation for Statistical Computing, Vienna, Austria), with a 2-sided  $P$  value  $< 0.05$  considered statistically significant.

**Table S1** Assignment table

| No. | Assignment           |               |
|-----|----------------------|---------------|
| 1   | valsartan            | participation |
| 2   | sacubitril/valsartan | participation |
| 3   | valsartan            | participation |
| 4   | sacubitril/valsartan | participation |
| 5   | valsartan            | participation |
| 6   | sacubitril/valsartan | participation |
| 7   | valsartan            | Participation |
| 8   | sacubitril/valsartan | Refuse        |
| 9   | valsartan            | Participation |
| 10  | sacubitril/valsartan | Participation |
| 11  | valsartan            | Participation |
| 12  | valsartan            | Participation |
| 13  | sacubitril/valsartan | Participation |
| 14  | valsartan            | Participation |
| 15  | sacubitril/valsartan | Participation |
| 16  | sacubitril/valsartan | Participation |
| 17  | sacubitril/valsartan | Participation |
| 18  | sacubitril/valsartan | Participation |
| 19  | sacubitril/valsartan | Participation |
| 20  | valsartan            | Participation |
| 21  | sacubitril/valsartan | Participation |
| 22  | valsartan            | Participation |
| 23  | valsartan            | Participation |

|    |                      |               |
|----|----------------------|---------------|
| 24 | valsartan            | Participation |
| 25 | valsartan            | participation |
| 26 | sacubitril/valsartan | participation |
| 27 | sacubitril/valsartan | participation |
| 28 | valsartan            | participation |
| 29 | valsartan            | participation |
| 30 | valsartan            | participation |
| 31 | sacubitril/valsartan | participation |
| 32 | sacubitril/valsartan | participation |
| 33 | sacubitril/valsartan | participation |
| 34 | sacubitril/valsartan | participation |
| 35 | valsartan            | participation |
| 36 | sacubitril/valsartan | participation |
| 37 | valsartan            | participation |
| 38 | sacubitril/valsartan | participation |
| 39 | valsartan            | participation |
| 40 | valsartan            | participation |
| 41 | sacubitril/valsartan | participation |
| 42 | valsartan            | participation |
| 43 | valsartan            | participation |
| 44 | sacubitril/valsartan | participation |
| 45 | valsartan            | participation |
| 46 | sacubitril/valsartan | participation |
| 47 | sacubitril/valsartan | participation |
| 48 | valsartan            | participation |

|    |                      |               |
|----|----------------------|---------------|
| 49 | valsartan            | participation |
| 50 | sacubitril/valsartan | participation |
| 51 | sacubitril/valsartan | participation |
| 52 | valsartan            | participation |
| 53 | sacubitril/valsartan | participation |
| 54 | valsartan            | participation |
| 55 | sacubitril/valsartan | participation |
| 56 | valsartan            | participation |
| 57 | sacubitril/valsartan | participation |
| 58 | sacubitril/valsartan | participation |
| 59 | valsartan            | participation |
| 60 | valsartan            | participation |
| 61 | valsartan            | participation |
| 62 | valsartan            | participation |
| 63 | sacubitril/valsartan | refuse        |
| 64 | sacubitril/valsartan | participation |
| 65 | valsartan            | participation |
| 66 | sacubitril/valsartan | participation |
| 67 | sacubitril/valsartan | participation |
| 68 | sacubitril/valsartan | participation |
| 69 | valsartan            | participation |
| 70 | sacubitril/valsartan | participation |
| 71 | valsartan            | participation |
| 72 | valsartan            | participation |
| 73 | sacubitril/valsartan | participation |

|    |                      |               |
|----|----------------------|---------------|
| 74 | valsartan            | participation |
| 75 | valsartan            | participation |
| 76 | valsartan            | participation |
| 77 | sacubitril/valsartan | participation |
| 78 | valsartan            | refuse        |
| 79 | sacubitril/valsartan | participation |
| 80 | sacubitril/valsartan | participation |
| 81 | sacubitril/valsartan | participation |
| 82 | valsartan            | participation |
| 83 | sacubitril/valsartan | participation |
| 84 | valsartan            | participation |
| 85 | sacubitril/valsartan | participation |
| 86 | valsartan            | participation |
| 87 | sacubitril/valsartan | participation |
| 88 | valsartan            | participation |
| 89 | valsartan            | participation |
| 90 | sacubitril/valsartan | participation |
| 91 | sacubitril/valsartan | participation |
| 92 | valsartan            | participation |
| 93 | valsartan            | participation |
| 94 | valsartan            | participation |
| 95 | sacubitril/valsartan | participation |
| 96 | sacubitril/valsartan | participation |
| 97 | sacubitril/valsartan | participation |
| 98 | valsartan            | participation |

|     |                      |               |
|-----|----------------------|---------------|
| 99  | sacubitril/valsartan | participation |
| 100 | valsartan            | participation |
| 101 | sacubitril/valsartan | participation |
| 102 | sacubitril/valsartan | participation |
| 103 | valsartan            | participation |

**Table S2.** Reasons for medication switch to ARNI in de-escalation group

| No. | Reason for medication change                                                                    |
|-----|-------------------------------------------------------------------------------------------------|
| 1   | Creatinine level worsens from normal to 1.27 mg/dL and symptoms worsen from NYHA class I to II  |
| 2   | Complaints of nausea and difficulty breathing                                                   |
| 3   | No worsening of objective indicators or worsening of symptoms, but attending physician decision |

ARNI, angiotensin receptor-neprilysin inhibitor; NYHA, New York Heart Association.

**Table S3.** Sensitivity analysis: change in NT-proBNP (pg/mL) during follow-up period among patients without CRT

|          | Population                  | Whole population<br>(n = 75) | De-escalation group<br>Intention-to-treat: n = 34<br>Per-protocol: n = 41 | Maintenance group<br>Intention-totreat: n = 31<br>Per protocol: n = 41 | <i>P</i> | <i>Adjusted P</i> |
|----------|-----------------------------|------------------------------|---------------------------------------------------------------------------|------------------------------------------------------------------------|----------|-------------------|
| Baseline | Intention-to-treat (n = 75) | 51.3 [23.0-104.5]            | 37.3 [21.4-123.0]                                                         | 53.0 [30.4-91.6]                                                       | .911     | .999              |
|          | Per-protocol (n = 72)       | 49.5 [21.9-94.8]             | 33.3 [21.4-98.2]                                                          | 53.0 [30.4-91.6]                                                       | .513     | .999              |
| 6 mo     | Intention-to-treat (n = 75) | 40.2 [14.9-109.0]            | 41.5 [17.8-99.0]                                                          | 37.9 [14.1-109.0]                                                      | .649     | .999              |
|          | Per-protocol (n = 72)       | 35.4 [13.8-99.0]             | 35.1 [13.8-92.1]                                                          | 37.9 [14.1-109.0]                                                      | .915     | .999              |
| 12 mo    | Intention-to-treat (n = 75) | 51.8 [19.1-114.0]            | 52.9 [26.3-120.0]                                                         | 50.7 [19.0-88.3]                                                       | .590     | .999              |
|          | Per-protocol (n = 72)       | 49.7 [19.1-90.4]             | 47.9 [24.0-112.0]                                                         | 50.7 [19.0-88.3]                                                       | .880     | .999              |

CRT, cardiac resynchronization therapy; NT-proBNP, N-terminal pro b-type natriuretic peptide.

Data are presented as median [25th percentile-75th percentiles].

*P*-values were calculated using the Mann-Whitney U test. Adjusted *P*-values were derived using the Bonferroni correction to account for multiple comparisons among the 3 timepoints.

## FIGURE LEGENDS

Figure S1. ARNI daily dose at the time of study enrolment.

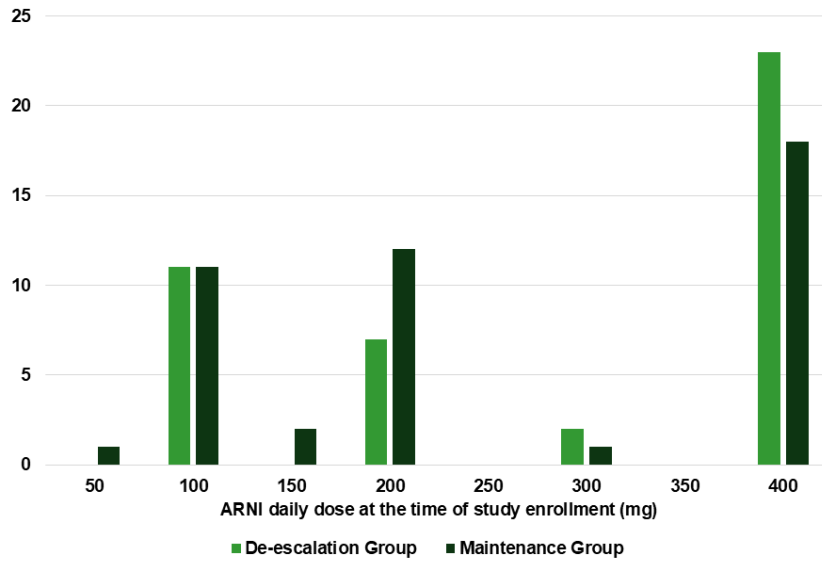

ARNI, angiotensin receptor-neprilysin inhibitor

Correcciones a la figura

Cambiar "enrollment" a "enrolment"

Cambiar "Group" a "group"

**Figure S2.** Changes in medication use over time in the de-escalation and maintenance groups.

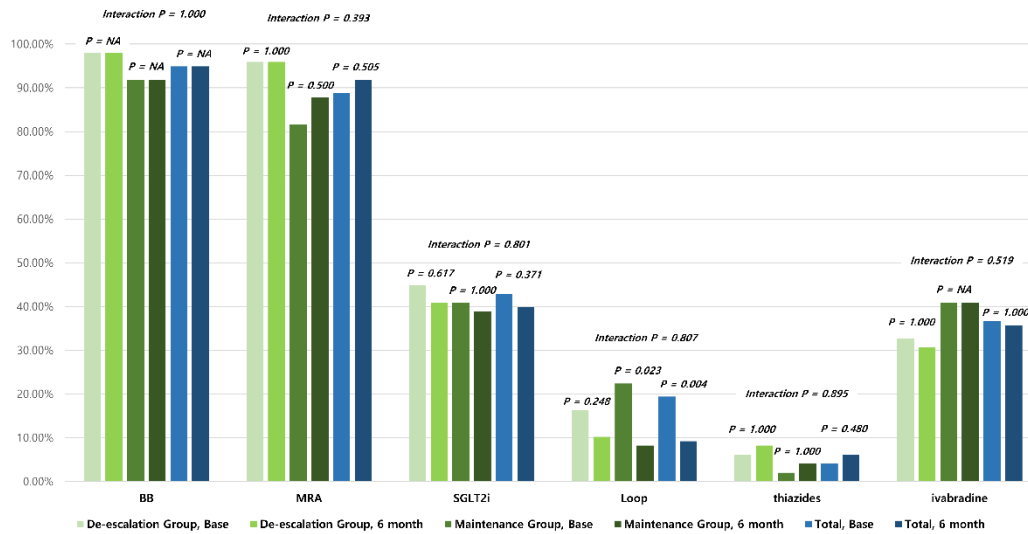

BB, beta-blocker; MRA, mineralocorticoid receptor antagonist; SGLT-2 inhibitor, sodium-glucose cotransporter 2 inhibitor.

Within-group changes ( $P$ ) in medication use over time were evaluated using the McNemar test. Interaction effects between group and timepoint (Interaction  $P$ ) were assessed using generalized linear mixed-effects models.

**Correcciones a la figura**

**Cambiar “Group” a “group”**

**Eje vertical: Cambiar “thiazides” a “Thiazides” y “ivabradine” a “Ivabradine”**

**Cambiar “ $P = 1.000$ ” a “ $P = .999$ ”**

**Cambiar “Base” a “baseline”**

**Quitar zero delante del punto decimal en los valores de P**

**Figure S3. Distribution of symptom scale and echocardiographic parameters over 12 months in the de-escalation and maintenance groups (related to table 5).**

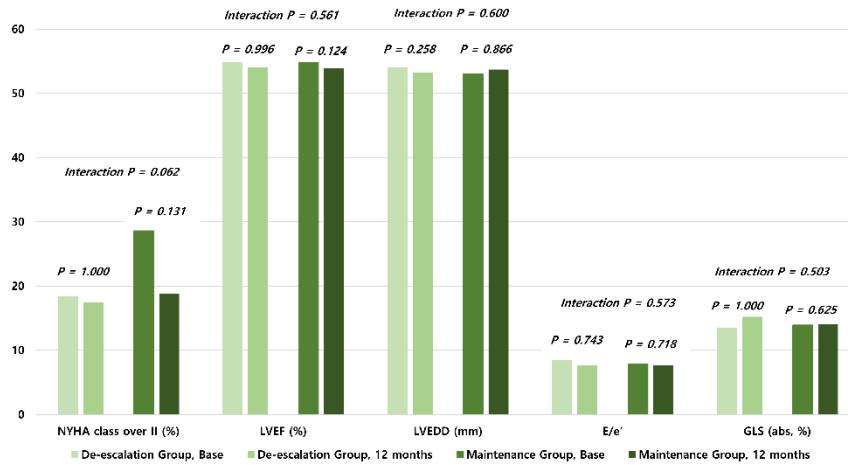

Within-group changes ( $P$ ) over time were evaluated using McNemar's test for paired binary categorical variables and the Wilcoxon signed-rank test for continuous variables. Interaction effects between group and timepoint (Interaction  $P$ ) were assessed using generalized linear mixed-effects models for binary outcomes and linear mixed-effects models for continuous outcomes.

GLS, global longitudinal strain; LVEDD, left ventricular end diastolic dimension; LVEF, left ventricular ejection fraction; NYHA, New York Heart Association

**Correcciones a la figura**

**Cambiar "Group" a "group"**

**Eje vertical: Cambiar "over II" a "> II"**

**Cambiar " $P = 1.000$ " a " $P = .999$ "**

**Cambiar "Base" a "baseline"**

**Quitar zero delante del punto decimal en los valores de P**

**Figure S4.** Sensitivity analysis: longitudinal changes in ln(NT-proBNP) levels among patients without CRT according to treatment strategy. (A) Intention-to-treat analysis (n = 75); (B) per-protocol analysis (n = 72).

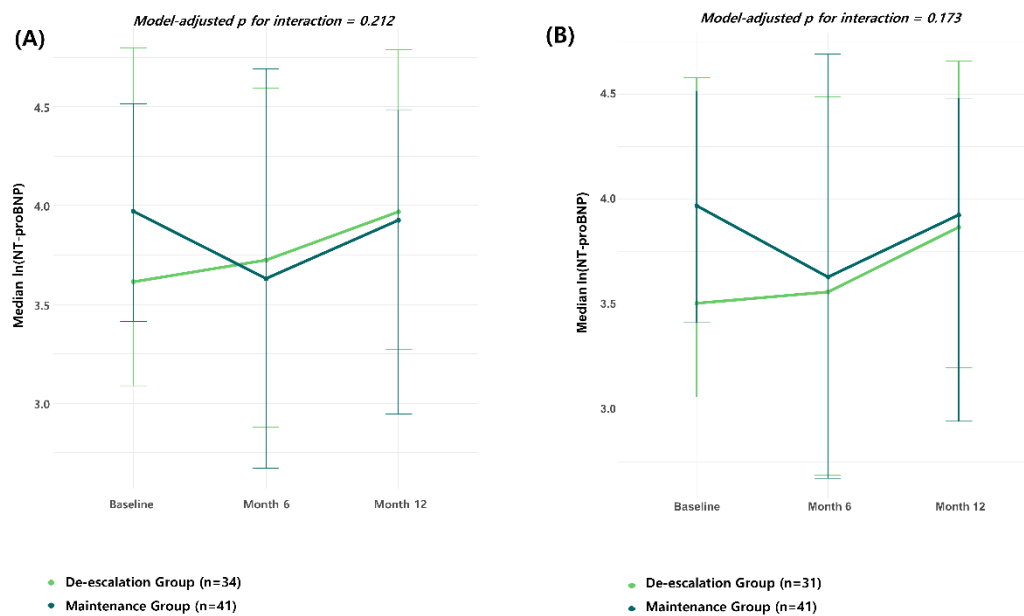

CRT, cardiac resynchronization therapy; NT-proBNP, N-terminal pro b-type natriuretic peptide.

Cambiar "Group" a "group"

Poner espacios a ambos lados de "="

Cambiar "p for" a "P for"

## REFERENCES OF THE SUPPLEMENTARY DATA

1. Cohen J. *Statistical Power Analysis for the Behavioral Sciences*. Burlington: Elsevier Science; 2013.
2. Halliday BP, Wassall R, Lota AS, et al. Withdrawal of pharmacological treatment for heart failure in patients with recovered dilated cardiomyopathy (TRED-HF): an open-label, pilot, randomised trial. *Lancet*. 2019;393:61-73.
3. Aoki S. Effect sizes of the differences between means without assuming variance equality and between a mean and a constant. *Heliyon*. 2020;6.
